# Sortilin exhibits tumor suppressor-like activity by limiting EGFR transducing function

Lapeyronnie E.<sup>1,†</sup>, Granet C.<sup>1,†</sup>, Tricard J.<sup>1,3</sup>, Gallet F.<sup>1</sup>, Yassine M.<sup>1</sup>, Chermat A.<sup>1,3</sup>,  
Jauberteau MO<sup>1</sup>, Bertin F.<sup>1,3</sup>, Melloni B.<sup>1,2</sup>, Vincent F.<sup>1,2,#</sup>, Naves T.<sup>1,§,#</sup> and Lalloué F.<sup>1,§,#</sup>

<sup>1</sup>EA3842 CAPTuR, Contrôle de l'Activation cellulaire, Progression Tumorale et Résistance  
thérapeutique and Chaire de Pneumologie Expérimentale, Université de Limoges, Faculté de  
Médecine, 2 Rue du Dr. Raymond Marcland, 87025 Limoges CEDEX-France.

<sup>2</sup>Service de Pathologie Respiratoire, Centre Hospitalier et Universitaire de Limoges, 87042  
Limoges CEDEX-France.

<sup>3</sup>Service de Chirurgie Thoracique et Cardio-vasculaire, Centre Hospitalier et Universitaire de  
Limoges, 87042 Limoges CEDEX-France.

\*These authors contributed equally to this work.

§Equal contribution.

# corresponding authors

Please address correspondence to:

Thomas Naves

Chaire de Pneumologie Expérimentale

EA3842 CAPTuR, Contrôle de l'Activation cellulaire, Progression Tumorale et Résistance  
thérapeutique

Faculté de Médecine

2, Rue du Docteur Marcland

87025, Limoges CEDEX

FRANCE

Tel: +33 5 55 45 59 70

Mail: [thomas.naves@unilim.fr](mailto:thomas.naves@unilim.fr)

Fabrice Lalloué

EA3842 CAPTuR, Contrôle de l'Activation cellulaire, Progression Tumorale et Résistance  
thérapeutique

37 Faculté de Médecine  
38 2, Rue du Docteur Marcland  
39 87025, Limoges CEDEX  
40 FRANCE  
41 Tel: +33 5 55 45 59 29  
42 Mail: [fabrice.lalloue@unilim.fr](mailto:fabrice.lalloue@unilim.fr)  
43  
44  
45

46 **SUMMARY (148 / 150 words)**

47 Lung cancer is the leading cause of cancer deaths worldwide and remains one of the most  
48 incurable. Tyrosine kinase receptors, such as the epidermal growth factor receptor (EGFR),  
49 are often aberrantly activated and drive tumor growth. Monotherapy with tyrosine kinase  
50 inhibitors to deactivate EGFR has shown initial efficacy, but their benefits tend to decline  
51 over time. EGFR acts as a transcriptional factor promoting the expression of co-oncogenic  
52 drivers, which, in turn, interact with canonical EGFR mutations to induce therapeutic relapse.  
53 This study reports that sortilin, a crucial regulator of cytoplasmic EGFR, attenuates its  
54 transducing function. Genome-wide chromatin binding revealed that sortilin interacts with  
55 gene regulatory elements occupied by EGFR. These results suggest a model, in which  
56 sortilin exhibits potential tumor suppressor-like activity by concurrently binding to regulatory  
57 elements of *cMYC*. Sortilin expression in lung adenocarcinoma may be predictive of the  
58 efficacy of anti-EGFR strategies.

59

60 **KEYWORDS (up to 10)**

61 EGFR, sortilin, *MYC*, TKI, lung adenocarcinoma

62

63

64

65

66

67

68

69

70

71

72 Lung adenocarcinoma (LUAD), which is present in about ~80% of patients with non-small  
73 cell lung cancer (NSCLC), remains the leading cause of cancer deaths worldwide<sup>1</sup>. About  
74 15% of these tumors contain somatic mutations in the gene encoding epidermal growth  
75 factor receptor (EGFR), constitutively activating the tyrosine kinase (TK) domain of EGFR,  
76 even in the absence of ligand stimulation. This sustained proliferative signaling<sup>2</sup> creates cells  
77 in which EGFR mutants act as principal oncogenic drivers<sup>3</sup>. Clinically, tyrosine kinase  
78 inhibitors (TKI)<sup>4</sup> limit the intensity and duration of EGFR proliferative signaling, thereby  
79 decreasing tumor aggressiveness and the course of disease<sup>5</sup>. However, although early and  
80 advanced LUAD do not differ in EGFR mutation frequency or type<sup>6</sup>, the clinical benefits of  
81 TKIs decline over time<sup>5,7</sup>.

82 Irrespective of disease stage, co-oncogenic drivers cooperate with canonical EGFR  
83 mutations in maintaining tumor malignancy and enhancing relapse. EGFR can act as a  
84 transcriptional factor<sup>8-10</sup>, directly promoting the expression of these co-drivers, such as *MYC*  
85 and *CCND1*, which have been implicated in epigenic reprogramming<sup>11</sup> and cell proliferation,  
86 respectively. These findings suggest that exclusive of its TK activity, EGFR function may be  
87 reoriented to its nuclear signaling network. Thus, controlling the spatiotemporal distribution of  
88 EGFR remains crucial in limiting its oncogenic driving force. We have reported that sortilin, a  
89 sorting receptor belonging to the vacuolar protein sorting 10 (VSP10) family, acts as a crucial  
90 regulator of EGFR endocytosis, limiting its proliferative signaling. To better determine the  
91 possible clinical role of sortilin in the treatment of tumors with constitutively activated EGFR,  
92 this study investigated whether sortilin could also act on the nuclear EGFR signaling network.

93 We recently observed that EGFR–sortilin complexes were present in the nuclei of EGF-  
94 stimulated cells concomitant with genome-wide chromatin binding, with these complexes  
95 binding to transcription regulatory elements of genes associated with relapse from TKI  
96 treatment and progressive disease<sup>12-14</sup>. Interestingly, sortilin was found to preferentially bind  
97 to the transcription-starting site (TSS) of *cMYC*, reducing the activity of this gene. The TKI  
98 osimertinib was shown to trigger massive EGFR internalization and importation into cell  
99 nuclei of EGFR–sortilin complexes, with sortilin expression in the nuclei repressing *cMYC*  
100 expression. Because sortilin expression is significantly lower than EGFR expression in LUAD  
101 cell lines, sortilin may act as a restrictive factor, limiting EGFR transcriptional functions.

102 We have therefore proposed a model, in which sortilin exhibits a potential tumor-  
103 suppressor-like activity by concurrently binding to the transcription regulatory elements of  
104 EGFR-targeted genes, thereby limiting the EGFR transducing activity. The present study  
105 provides insight into the therapeutic importance of sortilin expression in LUAD, especially in  
106 EGFR-positive tumors. Sortilin may both predict the efficacy of TKIs and be a new candidate  
107 for the treatment of LUADs.

108 **RESULTS**

109 ***Sortilin interacts with EGFR in the nucleus***

110 Based on findings showing that sortilin limits EGFR proliferative signaling<sup>15,16</sup>, we tested  
111 whether sortilin exhibits a tumor suppressor-like activity by acting on its nuclear signaling  
112 network. Although sortilin interacts physically with EGFR in A549 cells at or near the plasma  
113 membrane, as shown by red spots indicating sites of proximity ligation amplification (PLA),  
114 their interaction within the nuclei of cancer cells following EGF stimulation was not evaluated  
115 <sup>15,16</sup> (Figure 1a, insets 1-1 to 2-2). Z-stack confocal images and three-dimensional projections  
116 at 90° and 155° showed that EGFR–sortilin complexes were present in the nuclei of both  
117 EGF-stimulated and non-stimulated cells (Figure 1b, insets showing z axis #2 to #26). After  
118 incubation for 5 min, both the numbers of EGFR–sortilin clusters and their total volume in the  
119 nuclei of EGF-stimulated cells increased significantly ( $p<0.05$ , Figure 1c–e), suggesting that  
120 the translocation of EGFR–sortilin complexes started at early stages of EGFR endocytosis.  
121 Indeed, both immunoprecipitation (Figure 1f) and western blotting of isolated nuclei showed  
122 significant increases in EGFR–sortilin complexes ( $p<0.001$ , 30 min), with EGF kinetics  
123 suggesting specific sub-nuclear localizations<sup>17</sup> (Figure 1g–h). Because EGFR silencing  
124 significantly reduced ( $p<0.05$ ) the amount of sortilin in nuclear extracts despite EGF  
125 stimulation, sortilin translocation was likely not mediated by another member of the EGF  
126 family (Figure 1h and 1j).

127 These results suggest that sortilin is imported into the nuclei of cancer cells only in the  
128 presence of EGFR, and that nuclear EGFR importation requires EGFR endocytosis.  
129 Likewise, agglomeration of EGFR–sortilin complexes in the nuclei of EGF-stimulated cells  
130 suggests a specific sub-nuclear localization that might address transcriptional functions.

131

## Figure\_1\_Lapeyronnie\_Granet\_et\_al.

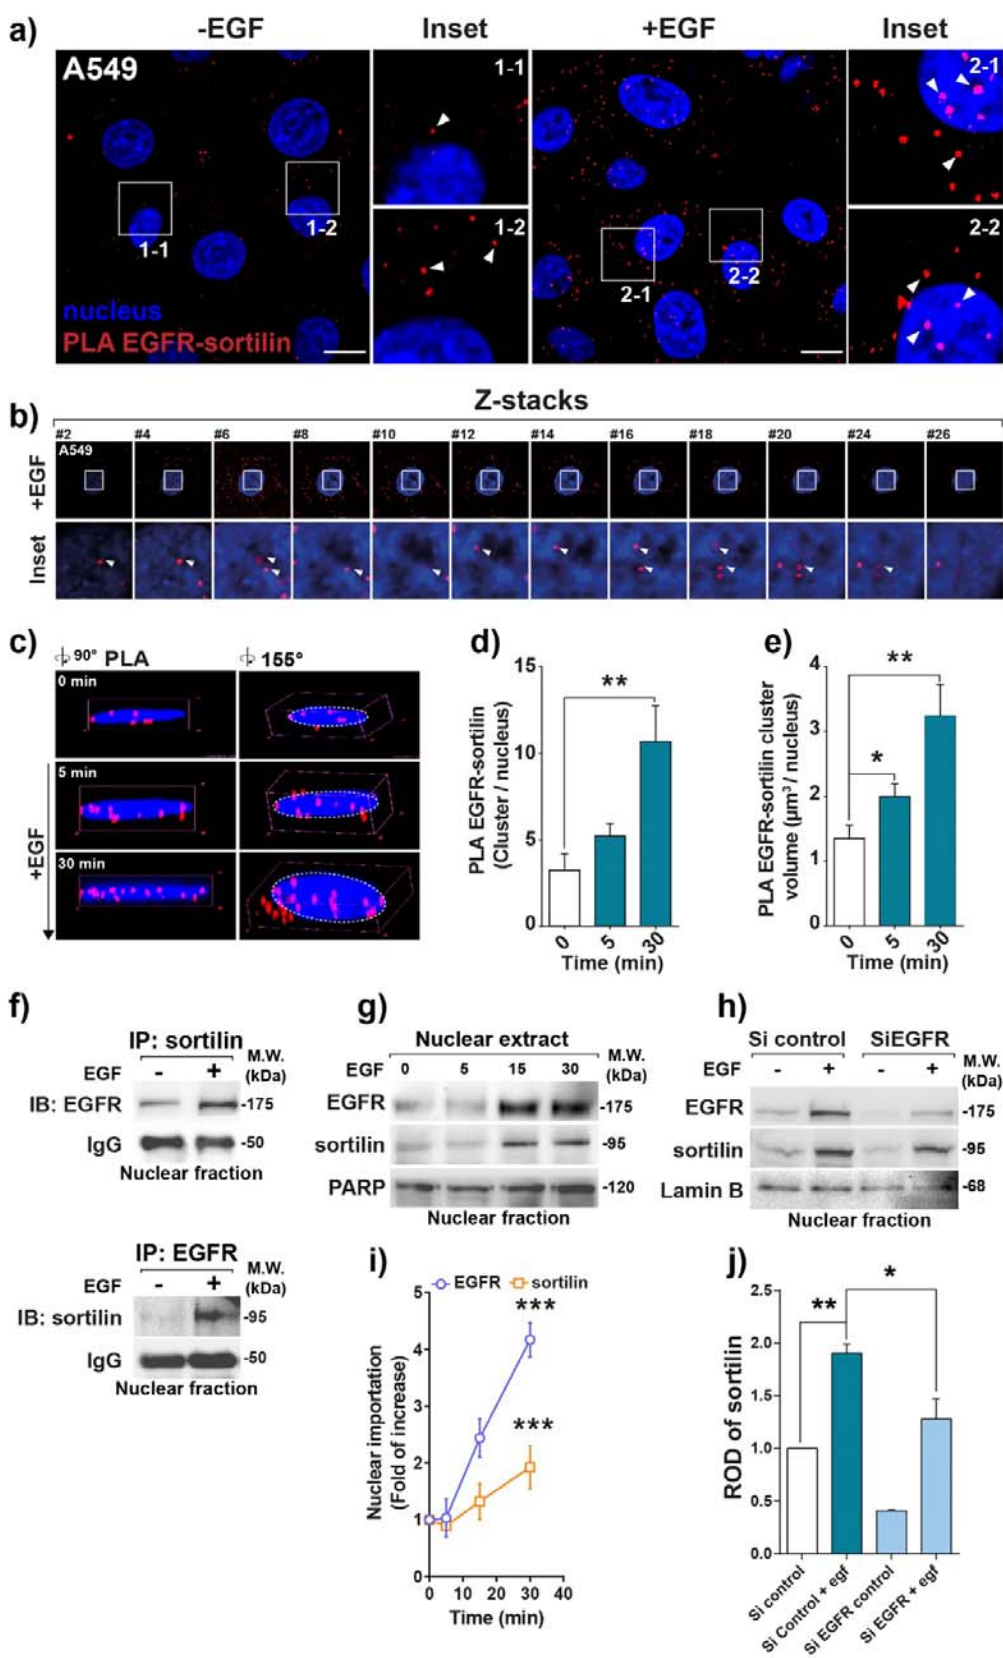

133 **Figure 1: Sortilin and EGFR interact together in the nuclei of cancer cells. (a)** Proximity  
134 ligation assay (PLA) showing the interaction between sortilin and EGFR in the lung  
135 adenocarcinoma cell line A549 in the absence or presence of EGF (50 ng/mL) for 30 min.  
136 Red spots indicate sites of PLA amplification, reflecting interactions between sortilin and  
137 EGFR. Scale bar, 10  $\mu\text{m}$ ; white arrows show EGFR–sortilin clusters. **(b)** Z-stack sections of  
138 confocal microscopy images showing sortilin and EGFR interactions in z axis (insets #2–26).  
139 White arrows show EGFR–sortilin clusters. **(c)** 3D confocal microscopy images showing  
140 EGFR–sortilin interactions at angles of 90° and 155°. **(d)** Quantification of EGFR–sortilin  
141 spots per nucleus, in the absence or presence of EGF for 5 or 30 min. **(e)** Estimated volumes  
142 of EGFR–sortilin clusters per nucleus ( $\mu\text{m}^3/\text{nucleus}$ ) in the absence or presence of EGF for 5  
143 or 30 min. **(f)** Confirmation of EGFR–sortilin interactions by nuclear co-immunoprecipitation  
144 of A549 cell lysates in the absence or presence of EGF (50 ng/mL) for 30 min and  
145 immunoblotted (IB) with anti-EGFR antibodies. **(g)** Immunoblots showing kinetics of EGFR  
146 and sortilin nuclear importation following EGF stimulation of A549 cells. Nuclear fractions  
147 were obtained 0, 5, 15, and 30 min after stimulation with 50 ng/mL EGF. **(h)** EGFR silencing  
148 by specific siRNA transfection for 72 h before assessment of sortilin importation into the  
149 nucleus by western blotting. **(i)** Quantification of nuclear importation of EGFR and sortilin  
150 following EGF stimulation. Molecular weights (MW) are shown in kilo Daltons (kDa). **(j)**  
151 Relative optical density (ROD) of sortilin expression in isolated nuclei following EGFR  
152 depletion by siRNA. All values represent means  $\pm$  SD. \* $p < 0.05$ , \*\* $p < 0.01$ , and \*\*\* $p < 0.001$  by  
153 Student's t-test. Each experiment was repeated at least three times.  
154

### 155 ***EGFR–sortilin complexes co-immunoprecipitate with chromatin***

156 To gain insight into the role of EGFR–sortilin complexes in the nuclei of EGF-stimulated  
157 cells, we investigated whether these complexes exhibited chromatin binding properties.  
158 Chromatin immunoprecipitation assays (ChIP) were performed using micrococcal nucleases  
159 (Mnase), with the quality of enzymatic digestion validated by assessing the ability to release  
160 mono-nucleosomes (Supplementary Materials 1a-d). Because sortilin was never shown to  
161 act as a transcriptional co-factor with genomic binding sequences, and because its nuclear  
162 importation would depend on EGFR (Figure 1h and 1j), we analyzed specific DNA  
163 sequences located within the promoter regions of genes belonging to the EGF transcriptional  
164 response pathway<sup>18</sup>. Thus, we selected the epigenetic reprogramming gene *cMYC*<sup>11</sup> and the  
165 cell cycling gene Cyclin D1 (*CCND1*)<sup>19</sup>. ChIP with anti-EGFR or anti-sortilin antibodies  
166 showed that EGF stimulation resulted in the amplification of *cMYC* and *CCND1* chromatin  
167 sequences (Figure 2a). Because amplification was not observed following  
168 immunoprecipitation with their respective isotype controls (IgG1 ChIP EGFR and IgG ChIP  
169 sortilin), these results suggest that both EGFR and sortilin interact specifically with chromatin  
170 and could participate in the activity of EGF-regulated genes (Figure 2a, IgG).

171 To identify the DNA regions immunoprecipitated by anti-EGFR and anti-sortilin antibodies,  
172 the ChIP products were sequenced (ChIP-Seq). All libraries bound by these antibodies met  
173 all ChIP-Seq quality control criteria (Supplementary Materials 1b and c). ChIP-Seq  
174 experiments were performed on biological replicates following stimulation with 50ng/mL EGF  
175 for 30 min, with reads averaging 50 million. The percentage frequencies of peaks enriched in  
176 stimulated A549 cells were predominantly distributed within intergenic and intronic regions,  
177 as well as toward transcriptional regulating elements, including the TSS and the transcription  
178 termination site (TTS) (Figure 2b). Analysis of the segmentation of TSS sequences revealed  
179 a preferential distribution for EGFR and sortilin. ChIP-Seq peak distributions within 5 kb of  
180 TSS with aggregation plots showed that the TSS/TTS ratios for EGFR and sortilin were 2.44  
181 and 1.78, respectively (Supplementary Figure 1). Not surprisingly, we observed an  
182 abundance of TSS peaks co-occurring with the highest expression of EGFR (Figure 2c and  
183 Supplementary Figure 1). Likewise, their overlap positions in close proximity to the TSS  
184 region suggested that EGFR–sortilin complexes affected gene activity (Supplementary  
185 Figure 1). The PLA and co-immunoprecipitation assays showing the physical interactions  
186 between EGFR and sortilin in the nuclei of A549 cells (Figure 1a–e) suggested that EGFR  
187 and sortilin have common binding sites on target loci. Significant correlations between EGFR  
188 and sortilin profiles were shown on ChIP-Seq overview using the IGV genome browser,  
189 which found EGFR and sortilin binding sites on the *CCND1* and *cMYC* TSS, as well as by  
190 Pearson's correlation coefficients among samples (Figure 2d and 2e). Similarly, *in silico*  
191 analysis suggested that both EGFR and sortilin bound to an AT-rich minimal consensus



192 sequence (ATRS), consisting of TNTTT or TTTNT, with N being any nucleotide (Figure 2f).  
193 These genomic sequences were previously associated with the EGFR chromatin binding  
194 site<sup>18,19</sup>, suggesting that EGFR–sortilin complexes potentially bind chromatin through EGFR.  
195 Taken together with our previous results, the binding patterns of EGFR and sortilin were  
196 close to gene-proximal regulatory elements, suggesting that EGFR–sortilin complexes are  
197 involved in EGF-induced molecular processes.  
198

## Figure\_2\_Lapeyronnie\_Granet\_et\_al.

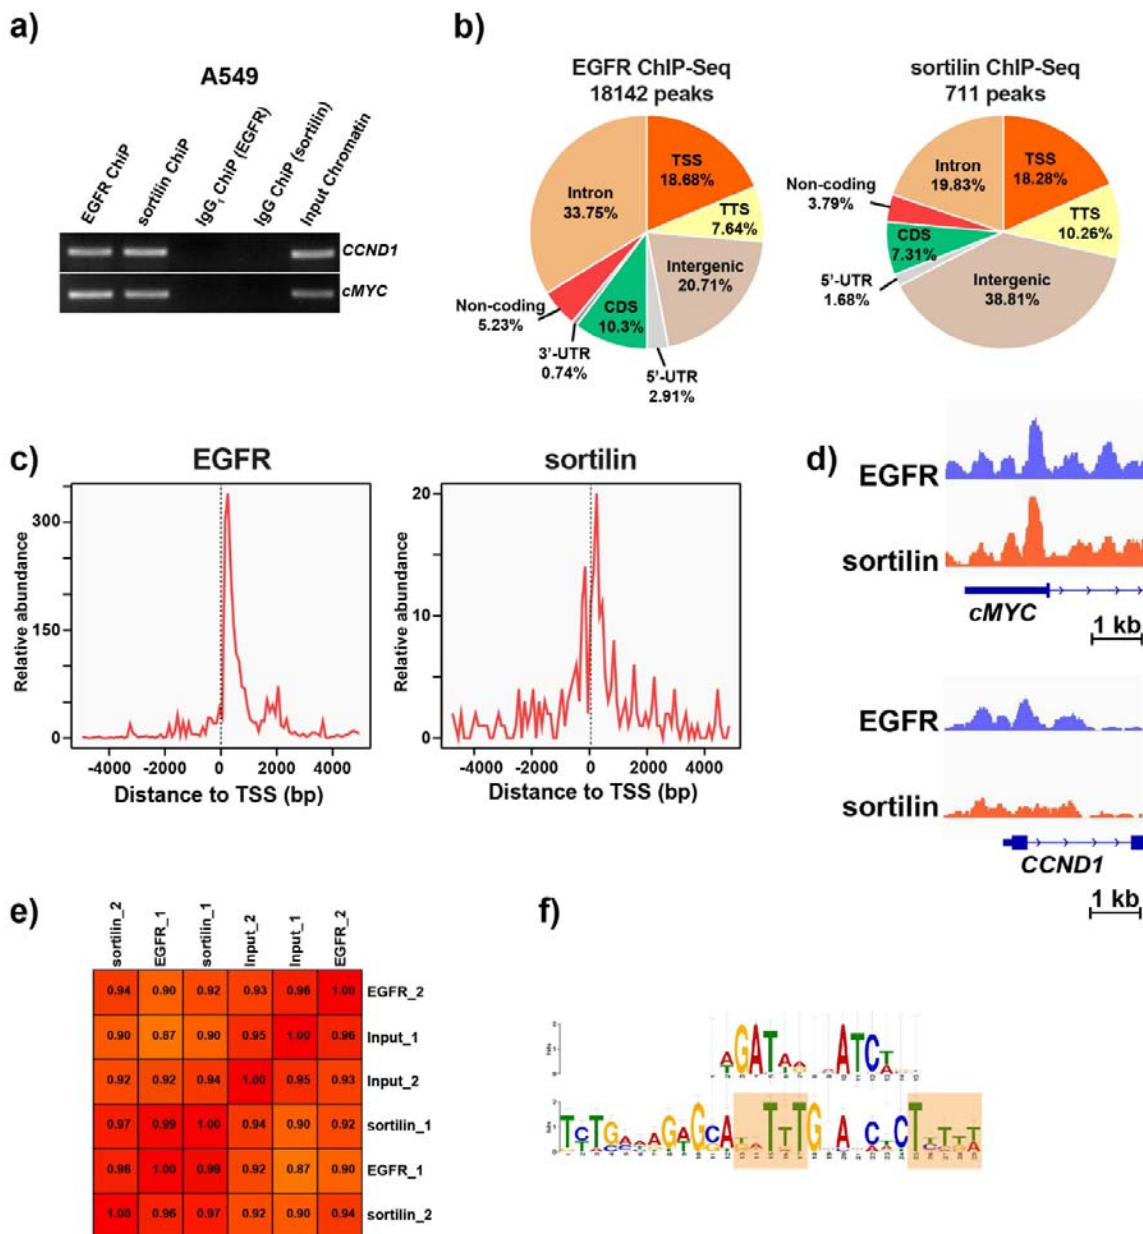

199

200

201

202

203

204

205

206

207

**Figure 2: EGFR and sortilin interact with chromatin.** (a) PCR amplification of *CCND1* and *cMYC* promoter sequences in A549 cells stimulated with EGF (50 ng/mL) for 30 min following chromatin immunoprecipitation (ChIP) with either anti-EGFR or anti-sortilin antibodies. Respective isotype IgGs, IgG1 ChIP(EGFR) and IgG ChIP (sortilin), were used as controls and compared with input samples (input chromatin) corresponding to non-ChIP DNA as internal control. (b) Peaks enriched for EGFR and sortilin in A549 cells stimulated with EGF (50 ng/mL) for 30 min. (c) Distribution of EGFR and sortilin ChIP-Seq reads near 5

208 kb upstream /downstream of TSS. **(d)** ChiP-Seq overview shown with the IGV genome  
209 browser representing EGFR and sortilin binding sites on *CCND1* and *cMYC* TSS. **(e)** Table  
210 showing Pearson correlation coefficients between each pair of ChIP conditions. Color  
211 intensity was representative of the magnitude of the correlation coefficient. **(f)** Common  
212 consensus sequences of EGFR and sortilin binding sites on chromatin.  
213

214 ***EGF stimulation enhances DNA occupancy by sortilin***

215 To further assess whether EGF promotes EGFR and sortilin DNA binding to  
216 transcriptional regulatory elements, we designed primers corresponding to the TSS regions  
217 of genes derived from gene ontology (GO) analysis (Supplementary Table 1), followed by the  
218 use of immunoprecipitated chromatin as a qPCR template. Each immunoprecipitation met  
219 ChIP quality control (data not shown), with non-specific DNA binding ruled out by using non-  
220 relevant immunoglobulins of the same class as the respective antibodies (data not shown).  
221 A549 cells were depleted of *EGFR* and *SORT1* mRNAs<sup>15,16</sup> using specific shRNAs and  
222 incubated with antibodies to specifically immunoprecipitate chromatin. No significant  
223 differences were observed between A549 cells transfected with empty vector (pLKO cells)  
224 and wild-type A549 cells (data not shown). EGF stimulation triggered significant ( $p < 0.001$ )  
225 chromatin binding of EGFR onto the TSS regions derived from *CCND1*, *cMYC*, and several  
226 genes selected by GO analysis (Figure 3a and Supplementary Figure 2a). Although EGF  
227 stimulation significantly enhanced ( $p < 0.001$  and  $p < 0.001$ ) sortilin binding to the TSS of  
228 selected genes (Figure 3b and Supplementary Figure 2b), amplification of the *cMYC* TSS  
229 was of especial interest. Indeed, EGF stimulation triggered a significant ( $p < 0.001$ ) reduction  
230 of sortilin chromatin binding to *cMYC* transcriptional regulatory elements when compared  
231 with control cells (Figure 3b). Because chromatin was not amplified in these mRNA-depleted  
232 cell lines (shRNA,  $p < 0.0001$ ) (Figure 3a and 3b), the differences between EGFR and sortilin  
233 binding profiles for *cMYC* TSS in basal condition may have specifically involved in *cMYC*  
234 gene activity. Likewise, because EGFR expression remains higher than that of sortilin,  
235 aggregation of free uncomplexed EGFR to sortilin could unbalance sortilin action toward  
236 gene activity. Indeed, EGFR depletion significantly ( $p < 0.001$ ) reduced the expression of  
237 *cMYC* mRNA but had no effect on *CCND1* mRNA expression (Figure 3c). By contrast, the  
238 levels of *CCND1* and *cMYC* mRNAs were significantly higher ( $p < 0.001$ ) in A549 *SORT1*  
239 mRNA-depleted than in control A549 cells (Figure 3d).

240 Taken together, these results suggest that sortilin impairs expression of EGF response  
241 genes and could compete with EGFR at *cMYC* regulatory elements, thus limiting the  
242 expression of EGFR oncogenic co-drivers.

243

### Figure\_3\_Lapeyronnie\_Granet\_et\_al.

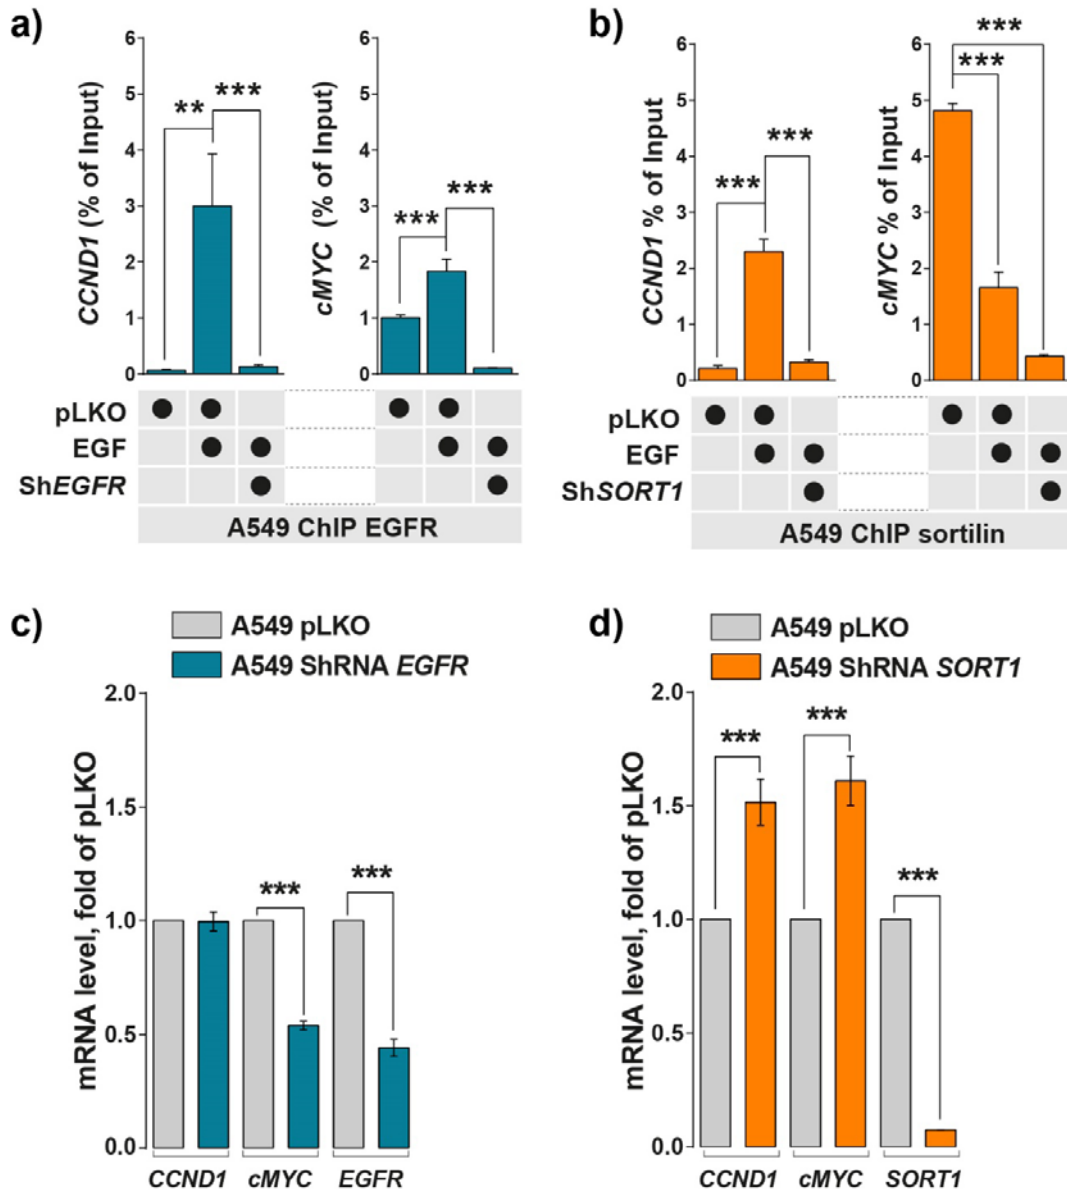

244

245

246

247

248

249

250

251

252

253

254

**Figure 3: EGF stimulation increases EGFR and sortilin binding to chromatin. (a-b)**

Quantitative PCR (qPCR) of chromatin immunoprecipitated (ChIP) by anti-EGFR (blue bars)

and anti-sortilin (orange bars) antibodies in control cells (pLKO) and cells depleted of *EGFR*

or *SORT1* mRNA by incubation with shRNAs, and incubated in the absence or presence of

EGF (50 ng/mL) for 30 min. Histograms represented the percentages of input following

normalization. *CCND1* and *cMYC* promoters were amplified by qPCR. **(c-d)** RT-qPCR

measurements of *CCND1* and *cMYC* mRNAs in A549 cells depleted of *EGFR* or *SORT1*

mRNA with shRNAs and in control cells (pLKO). All values represent means  $\pm$  SD,

\*\*\* $p < 0.001$  by Student's t-test. Each experiment was repeated at least three times.

255 ***Sortilin overexpression limits polymerase II recruitment to TSS***

256 Because EGFR protein levels are decreased in H1975 cells overexpressing *SORT1* (*OE-*  
257 *SORT1*)<sup>15</sup>, we performed ChIP experiments using these cells and H1975 cells or transfected  
258 with empty vector (EV). As expected, EGF stimulation of control (EV) cells triggered  
259 significant ( $p < 0.001$ ) chromatin binding by both EGFR and endogenous sortilin (Figure 4a  
260 and Supplementary Figure 3a). By contrast, because sortilin overexpression reduced EGFR  
261 stability, EGFR chromatin binding decreased significantly despite EGF stimulation (Figure 4a  
262 and Supplementary Figure 3b). Under such experimental conditions, sortilin binding to  
263 chromatin was reduced when compared with control cells, whereas sortilin binding to the  
264 *cMYC* TSS was not altered by EGF stimulation (Figure 4b). Thus, sortilin continued to  
265 occupy the *cMYC* TSS when compared with non-stimulated *OE-SORT1* cells (Figure 4b and  
266 Supplementary Figure 3b). Using this model, we assessed the recruitment of polymerase II  
267 (Pol II), belonging to the initiating transcription complex, toward the TSS surface occupied by  
268 EGFR and sortilin (Figure 4c). Interestingly, the chromatin binding of Pol II to *cMYC* and  
269 *CCND1* TSS was significantly lower in cells overexpressing sortilin than in control cells, as  
270 was the binding of Pol II to selected genes from GO analysis (Figure 4c and Supplementary  
271 Figure 3c). Sortilin binding was higher in cells overexpressing *SORT1* than in EV cells,  
272 suggesting that sortilin impairs recruitment of Pol II and the gene activity of *CCND1* and  
273 *cMYC*. To further evaluate the consequences of increased sortilin chromatin binding, we  
274 assessed the levels in these cells of *CCND1* and *cMYC* mRNAs. Surprisingly, sortilin  
275 overexpression significantly reduced ( $p < 0.001$ ) the mRNA levels of the EGFR co-drivers  
276 *CCND1* and *cMYC* (Figure 4d).

277 Taken together, these results suggest that the amount of sortilin would represent a limiting  
278 factor to impair EGFR binding and Pol II recruitment at the TSS of EGF response genes.  
279 Moreover, in the presence of TKIs, the inhibition of EGFR kinase activity may result in an  
280 imbalance in sortilin chromatin binding.

Figure\_4\_Lapeyronnie\_Granet\_et\_al.

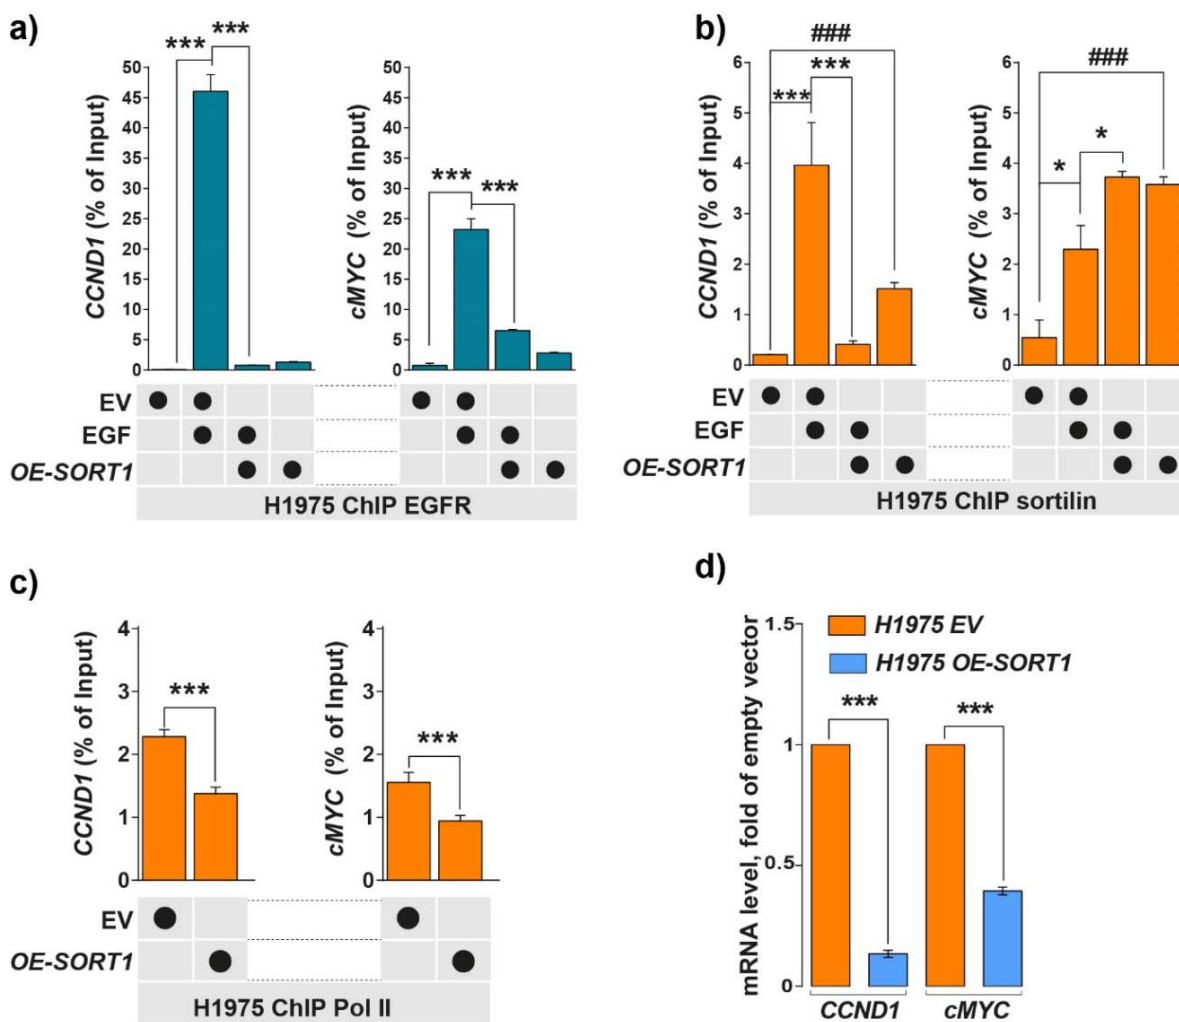

281

282 **Figure 4: Sortilin overexpression increases sortilin chromatin binding on *cMYC* and**  
 283 **limits polymerase II recruitment. (a-b)** EGFR and sortilin ChIP-qPCR were performed on  
 284 H1975 control cells transfected with empty vector (EV) or on H1975 sortilin overexpressing  
 285 cells (*OE-SORT1*) in the absence or presence of EGF (50 ng/mL) for 30 min. *CCND1* and  
 286 *cMYC* promoters were amplified by qPCR. **(c)** Pol II ChIP-qPCR performed on EV and *OE-*  
 287 *SORT1* cells. **(d)** Levels of *CCND1* and *cMYC* mRNAs in control (EV) and *OE-SORT1* cells  
 288 by qPCR. All values represent means  $\pm$  SD, \* $p$ <0.05, \*\* $p$ <0.01, \*\*\* $p$ <0.001, and ### $p$ <0.001  
 289 by Student's t-tests. Each experiment was repeated at least three times.

290

291 ***Osimertinib triggers nuclear importation of EGFR***

292 The spatiotemporal distribution of EGFR remains critical in the treatment of patients with  
293 lung cancer, with patients relapsing due to sustained proliferative signaling in the endosome  
294 platform or enhanced nuclear importation<sup>20</sup>. The subcellular distribution of EGFR, however, is  
295 dependent on EGFR mutational status<sup>21</sup>. For example, EGFR with a T790M mutation in  
296 H1975 cells is constitutively active, being internalized<sup>15,21</sup>, whereas wild-type EGFR in A549  
297 cells remains at the plasma membrane in the absence of ligand stimulation<sup>15,21</sup>. Because  
298 EGFR-targeted agents have been found to trigger EGFR endocytosis<sup>9,22</sup>, we investigated  
299 EGFR distribution following TKI exposure; whether inhibition of its kinase activity by  
300 osimertinib, a TKI designed to inhibit the activity of EGFR containing the T790M mutation<sup>23</sup>,  
301 impairs EGFR chromatin binding; and whether competition with sortilin for chromatin binding  
302 would limit the activity of this TKI. Strikingly, we found that treatment of A549 cells with 1  $\mu$ M  
303 osimertinib for 24 h triggered massive EGFR endocytosis, similar to that observed by ligand  
304 stimulation with 50 ng/mL for 30 min (Figure 5a, insets 1-1 to 6-2). Cell fractionation and  
305 isolation of nuclei resulted in massive importation of EGFR in the nuclei of both cell lines,  
306 irrespective of its initial subcellular distribution (Figure 5b). Treatment with osimertinib did not  
307 inhibit EGFR importation into the nucleus, although it reduced EGFR phosphorylation.  
308 Similar to EGF stimulation (Figure 1a–f), treatment with osimertinib also resulted in the  
309 nuclear importation of sortilin, suggesting that irrespective of stimuli, sortilin could be co-  
310 imported with EGFR in a manner independent of the phosphorylation status of the latter.

311



## Figure\_5\_Lapeyronnie\_Granet\_et\_al.

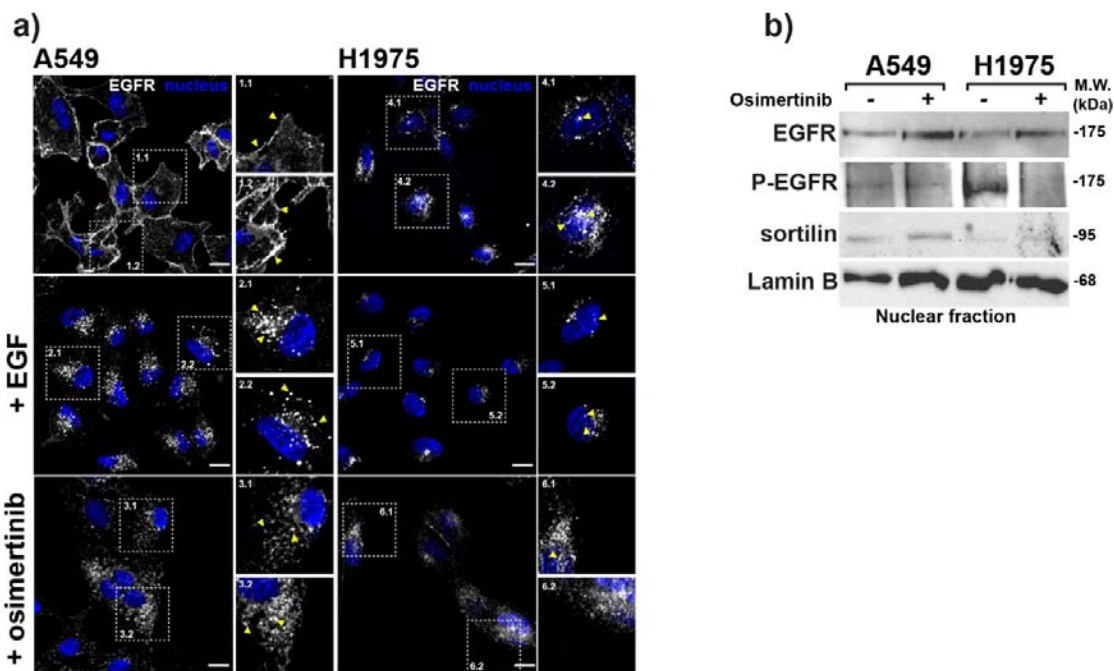

312

313 **Figure 5: Osimertinib enhances nuclear importation of EGFR.** (a) EGFR localization was  
314 analyzed by confocal microscopy in A549 and H1975 cells, in the absence or presence of  
315 EGF stimulation (50 ng/mL for 30 min) or osimertinib treatment (1  $\mu$ M for 24 h). Scale bar, 10  
316  $\mu$ m, yellow arrows show EGFR location. (b) Western blotting showing that treatment of A549  
317 and H1975 cells with osimertinib (1  $\mu$ M for 24 h) controlled EGFR and sortilin importation into  
318 isolated cell nuclei following cell fractionation. Molecular weight (MW) in kilo Daltons (kDa).

319

320

321 ***Osimertinib increases sortilin chromatin binding to cMYC TSS***

322 We subsequently assessed whether EGFR and sortilin binding to chromatin increases  
323 following the enrichment of these proteins in the nuclear compartment. Osimertinib treatment  
324 of A549 cells carrying wild-type EGFR significantly increased EGFR binding to chromatin for  
325 each selected TSS sequence (Figure 6a and Supplementary Figure 4a). Similarly,  
326 osimertinib significantly increased sortilin binding to all chromatin sequences, except for  
327 *cMYC* TSS, where its binding remained unchanged when compared with control of A549  
328 cells (Figure 6b and Supplementary Figure 4b). Strikingly, only *cMYC* TSS binding was  
329 significantly increased following osimertinib treatment of the EGFR-mutated H1975 cell line,  
330 whereas sortilin binding to both *CCND1* and *cMYC*, as well as to selected genes from GO  
331 analysis, increased significantly (Figure 6c and 6d, and Supplementary Figure 5a and 5b). To  
332 further analyze gene activity following chromatin binding by EGFR and sortilin, we assessed  
333 the levels of *CCND1* and *cMYC* mRNAs in these cells (Figure 6e–g). Osimertinib treatment  
334 of H1975 cells did not significantly reduce the level of *cMYC* mRNA relative to that of *CCND1*  
335 mRNA and to the level of *cMYC* mRNA in A549 cells, suggesting that EGFR and sortilin  
336 compete in binding to the *cMYC* TSS (Figure 6f). Indeed, unbalancing the proportion of  
337 sortilin in the *SORT-OE* model significantly reduced the level of *cMYC* mRNA relative to that  
338 in EV cells (Figure 6g).

339 Taken together, these results suggest that sortilin competes for binding to the regulatory  
340 elements of the *cMYC* gene, and that its expression would remain a limiting factor in the  
341 EGFR transcriptional program, irrespective of stimuli triggering its nuclear importation.

342

Figure\_6\_Lapeyronnie\_Granet\_et\_al.

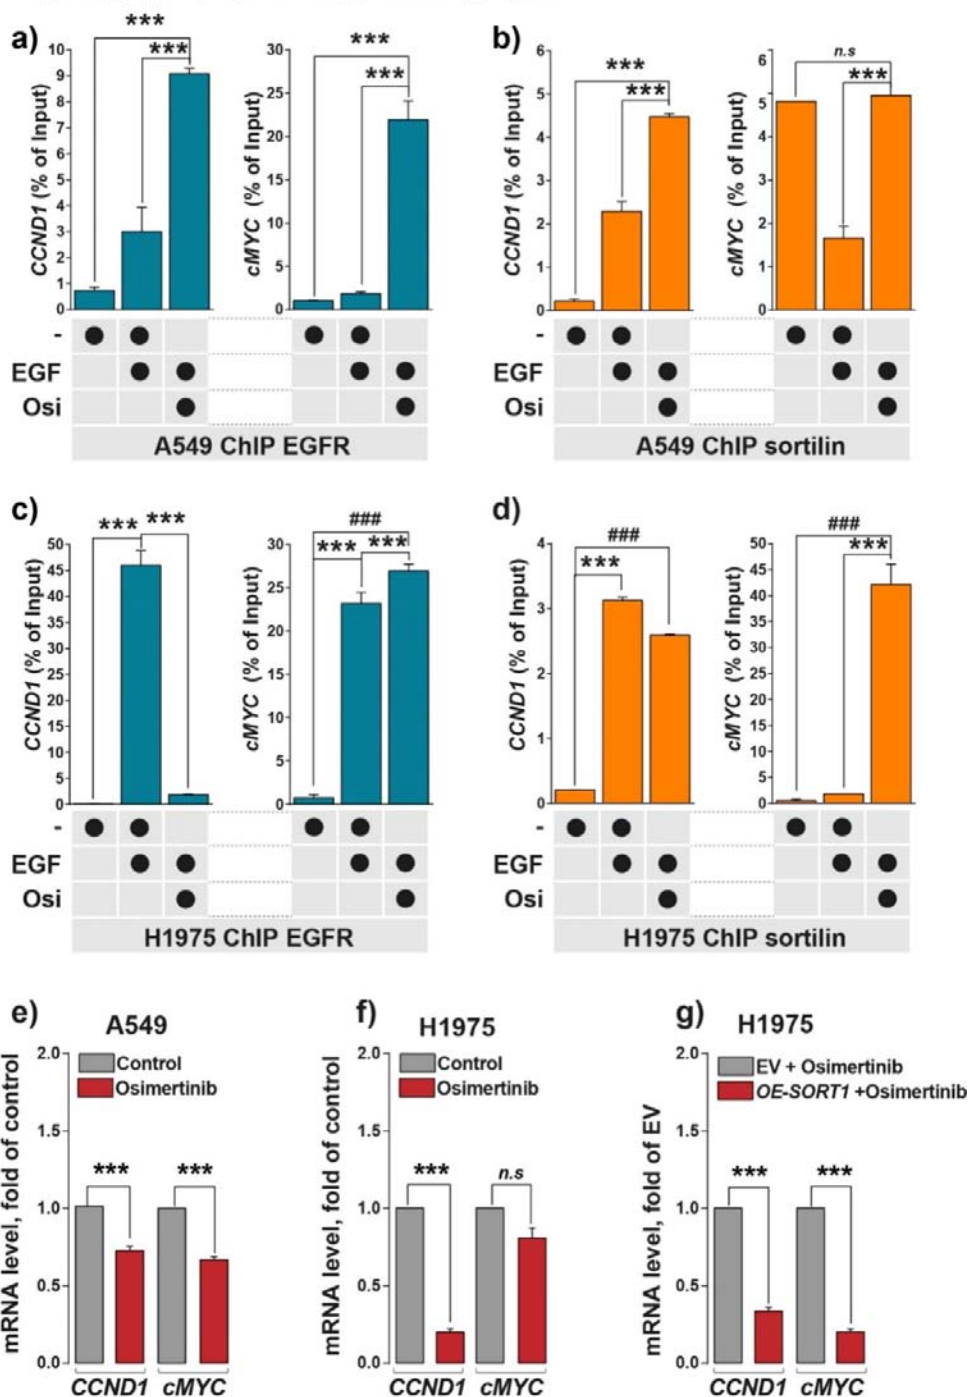

343

344

345

346

347

348

349

**Figure 6: Osimertinib increases EGFR and sortilin binding to chromatin. (a-d)** Results of EGFR and sortilin ChIP-qPCR of A549 and H1975 cells incubated in the absence or presence of EGF (50 ng/mL for 30 min) or osimertinib (1  $\mu$ M for 24 h). *CCND1* and *cMYC* promoter sequences were amplified by qPCR. **(e-f)** Levels of *CCND1* and *cMYC* mRNAs determined by RT-qPCR in A549 and H1975 cells in the absence or presence of osimertinib. **(g)** *CCND1* and *cMYC* mRNAs were quantified by RT-qPCR in control H1975 cells carrying

350 empty vector (EV) and H1975 cells overexpressing (OE-SORT1) in the presence of  
351 osimertinib. All values represent means  $\pm$  SD, \*\*\* $p$ <0.001 and ### $p$ <0.001 by Student's t-  
352 tests, n.s.: not significant. Each experiment was repeated at least three times.

### 353 ***Inverse correlation between cMYC and sortilin expression***

354 Because uncontrolled EGFR proliferative signaling leads to cell transformation<sup>3,24</sup> and  
355 ADC initiation<sup>25–27</sup>, and because malignant behavior is enhanced by mutation of the EGFR  
356 TK domain, we generated an inducible model (Tet-ON), in which sortilin expression was  
357 triggered in H1975 cells. Using this model, we found that treatment with doxycycline  
358 triggered sortilin expression, thereby unbalancing EGFR stability (Figure 7a). Although  
359 EGFR–sortilin complexes were increased in the nuclei of H1975<sup>Tet-ON-SORT1</sup>-induced cells, as  
360 evidenced by immunoprecipitation in the presence or absence of EGF stimulation (Figure  
361 7b), levels of *CCND1* and *cMYC* mRNAs decreased significantly ( $p < 0.001$ , orange  
362 histograms, Figure 7c). *In vivo*, sortilin expression triggered a significant global slowdown of  
363 tumor progression ( $p < 0.001$ , orange curve, Figure 7d) when compared with non-induced  
364 cells (blue curve, Figure 7d). Strikingly, we also observed significant reductions in the levels  
365 of *CCND1* ( $p < 0.01$ ) and *cMYC* ( $p < 0.05$ ) mRNAs (orange histograms, Figure 7e), further  
366 suggesting that sortilin has a tumor suppressor-like activity on the expression of EGFR co-  
367 drivers associated with EGF transcriptional responses. Because these results suggested that  
368 sortilin expression would unbalance EGF transcriptional response, we assessed their clinical  
369 relevance by analyzing *SORT1* mRNA expression in 54 patients with LUAD. We found that  
370 *SORT1* mRNA levels were significantly lower ( $p < 0.001$ ) in tumor than in adjacent normal  
371 tissue samples (blue boxes, Figure 7f), findings confirmed in data sets from two other  
372 studies<sup>28 29</sup> (blue boxes, Figure 7g and 7h), irrespective of disease stages ( $p < 0.001$ ) (Figure  
373 7i).

374 We therefore categorized these patients by quartiles of *SORT1* mRNA expression and  
375 compared their levels of expression of other mRNAs. Interestingly, we found that only *cMYC*  
376 mRNA expression was affected by the level of *SORT1* mRNA expression, with *cMYC* mRNA  
377 expression being significantly lower ( $p < 0.001$ , blue box, Figure 7k) in patients with high  
378 sortilin expression (Upper). We also evaluated the effects of sortilin expression on *cMYC*  
379 expression in several publicly available data sets from the MSKCC cBioPortal<sup>30,31</sup>, including  
380 240 patients in The Cancer Genome Atlas (TCGA)<sup>32</sup> and 665 solid cancer cell lines in the  
381 Cancer Cell Line Encyclopedia (CCLE)<sup>33</sup>. Strikingly, *cMYC* expression was inversely  
382 correlated with *SORT1* expression in both patient tissue samples ( $r = -0.24$ ,  $p = 8.7 \cdot 10^{-8}$ ) and  
383 cancer cell lines ( $r = -0.2$ ,  $p = 1.6 \cdot 10^{-8}$ ).

384 Taken together, these findings suggest that sortilin alters the activity of the epigenetic  
385 reprogramming gene, *cMYC*. Because sortilin remains dysregulated in malignant tissues,  
386 enabling an imbalance in the EGF transcriptional response, the malignant behavior of tumors  
387 with mutant EGFR would be increased by the expression of co-oncogenic drivers despite the  
388 presence of a TKI.

389

390

Figure\_7\_Lapeyronnie\_Granet\_et\_al.

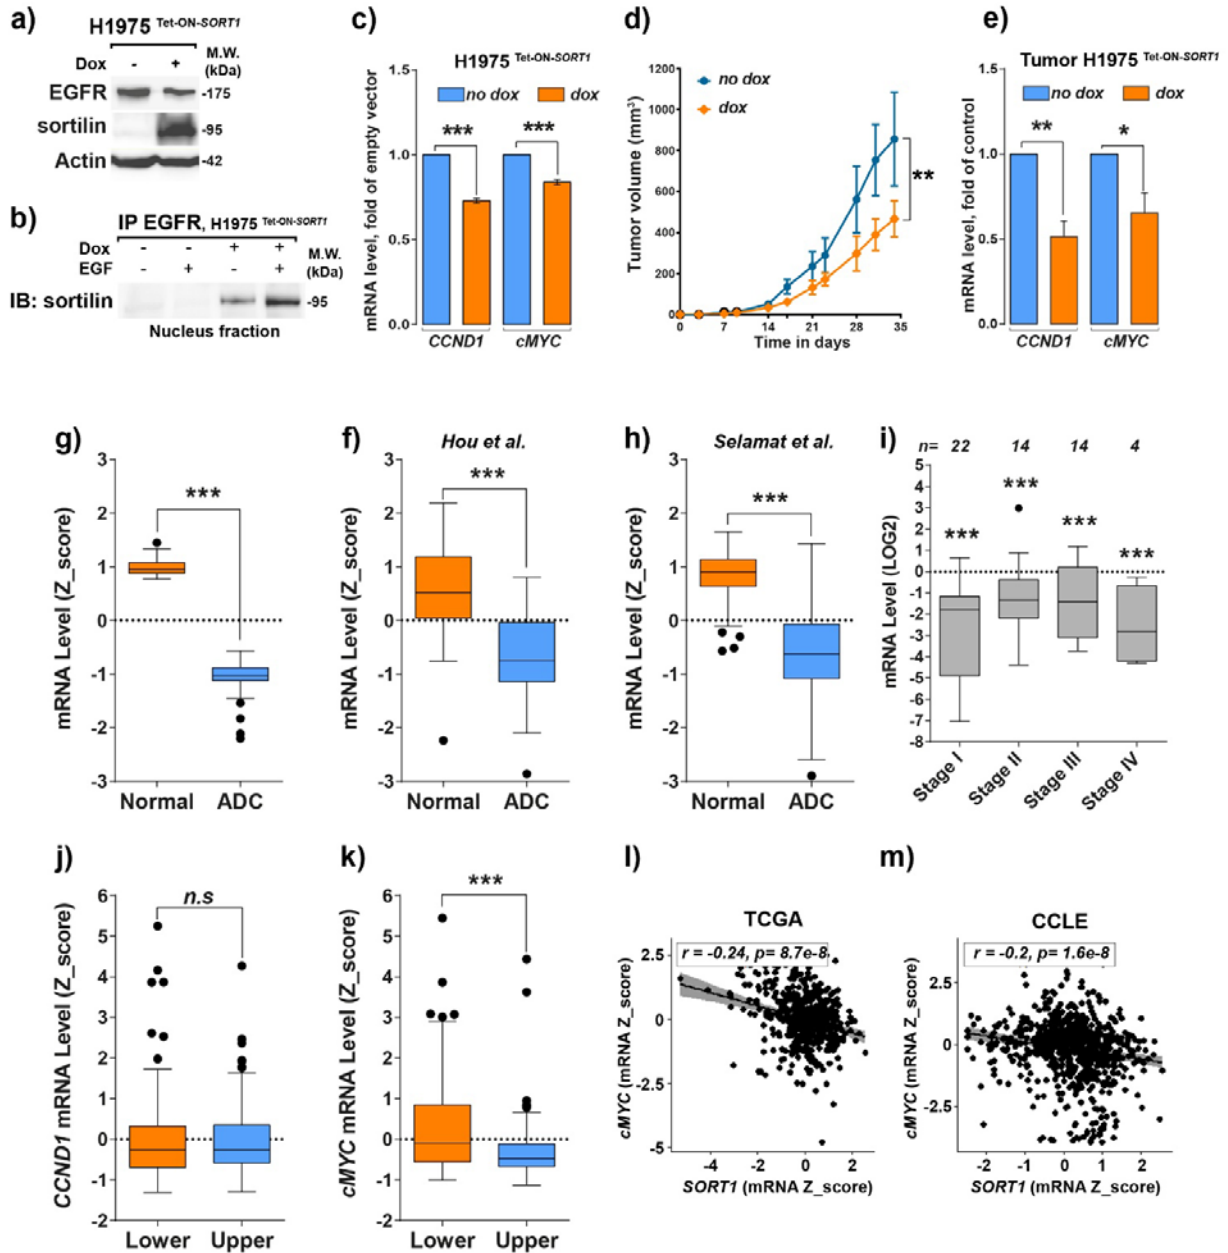

391

392

**Figure 7: *cMYC* expression correlates inversely with *SORT1* expression *in vitro* and in**

393

**tumor samples. (a)** Western blotting showing EGFR and sortilin expression in lysates of

394

H1975<sup>Tet-ON-SORT1</sup> cells following incubation in the absence or presence of 100 nM doxycycline

395

(dox) for 24 h. **(b)** Anti-EGFR immunoprecipitation (IP) of isolated nuclei from H1975<sup>Tet-ON-</sup>

396

*SORT1* cells following incubation in the absence or presence of 100 nM doxycycline for 24 h and

397

stimulation with 50 ng/mL EGF for 30 min and immunoblotting (IB) with anti-sortilin. **(c)**

398

Comparison of *CCND1* and *cMYC* mRNA levels in H1975<sup>Tet-ON-SORT1</sup> cells following incubation

399

in the absence or presence of 100 nM doxycycline for 24 h. **(d)** Effects of doxycycline on

400 tumor induction by H1975<sup>Tet-ON-SORT1</sup> cells in NOD-SCID mice. H1975<sup>Tet-ON-SORT1</sup> cells were  
401 subcutaneously engrafted ( $3 \times 10^6$  cells/mouse) onto NOD-SCID mice. Fifteen days later,  
402 corresponding to the beginning of tumor development, mice were treated with 2 mg/mL  
403 doxycyclin in drinking water or drinking water alone, and tumor volumes were measured.  
404 Tumor growth curves are shown for mice treated with dox (orange curve) and for control  
405 mice (blue curve). **(e)** qPCR measurements of expression of *CCND1* and *cMYC* mRNAs in  
406 tumors of mice treated with (blue bar) and without (orange bar) dox. **(f-h)** Measurements of  
407 *SORT1* mRNA levels (Z-score) in normal and lung adenocarcinoma (ADC) tissue samples  
408 obtained from the **(f)** Limoges University Hospital cohort and data sets from references **(g)**  
409 28 and **(h)** 29. **(i)** qPCR measurements of *SORT1* mRNA levels in tumor samples from the  
410 Limoges University Hospital cohort at different stages. **(j, k)** Quantification of **(j)** *CCND1* and  
411 **(k)** *cMYC* mRNA levels in tumor samples from the Limoges University Hospital cohort  
412 expressing the lowest and highest quartiles of sortilin expression. **(l)** Correlation between  
413 levels of *cMYC* and *SORT1* mRNA levels in NSCLC patients in the TCGA database ( $r=-0.24$ ;  
414  $p=8.7 \cdot 10^{-8}$ ) and **(m)** in solid cancer cell lines from the Cancer Cell Line Encyclopedia (CCLE)  
415 database ( $r=-0.2$ ;  $p=1.6 \cdot 10^{-8}$ ). Diagrams represent the correlation between *SORT1*  
416 expression and *cMYC* expression. All values are expressed as means  $\pm$  SD, \*\* $p < 0.01$  and  
417 \*\*\* $p < 0.001$  by Student's t-test, n.s.: not significant. Each experiment was repeated at least  
418 three times.  
419



Figure\_8\_Lapeyronnie\_Granet\_et\_al.

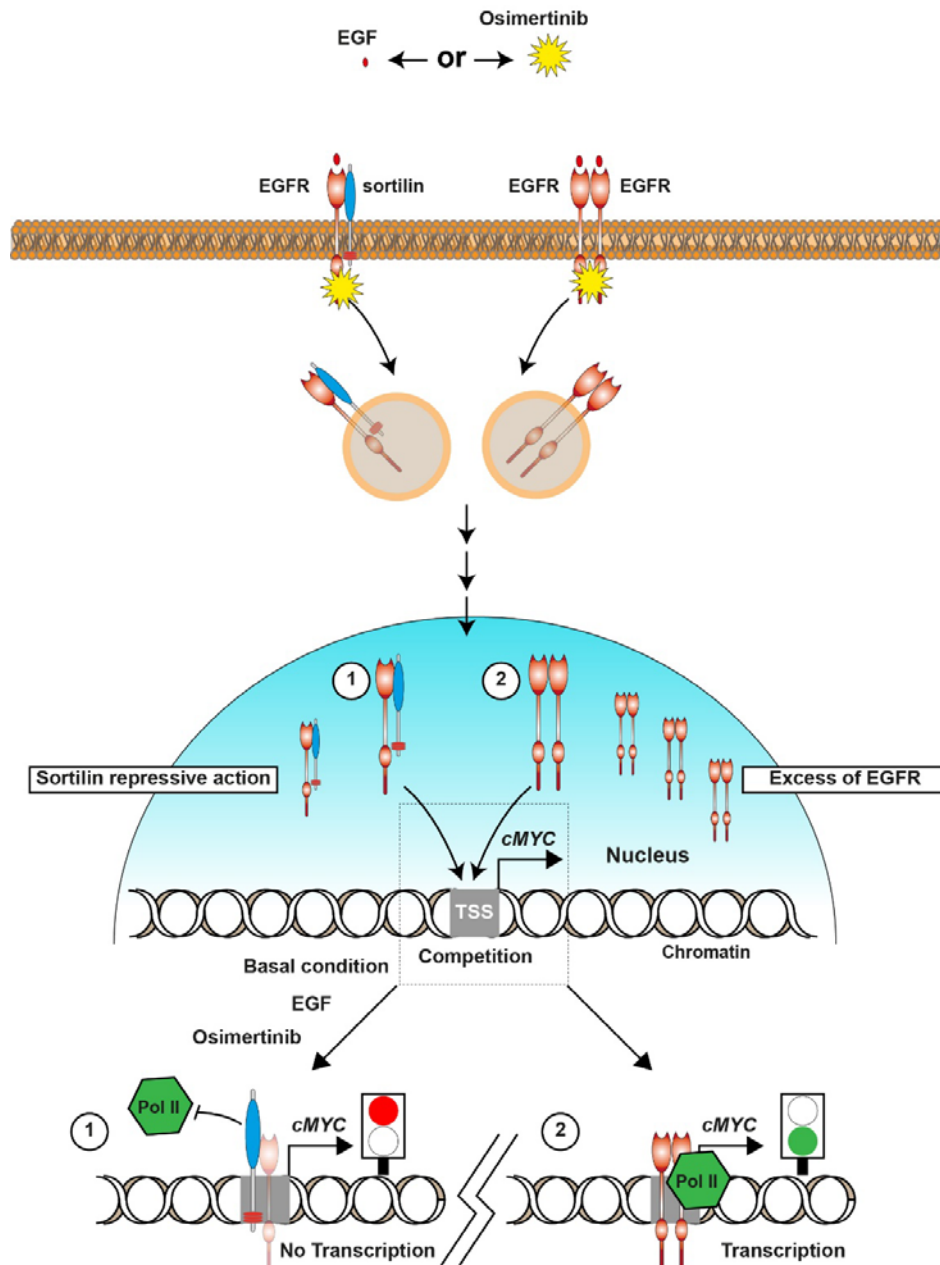

420

421

422

423

424

425

426

427

428

**Figure 8: Model of sortilin regulation of transcription.** Schematic diagram showing that sortilin has tumor suppressor-like activity, reducing co-oncogene transcription. EGF activates EGFR and induces its internalization as a heterodimer with sortilin. Osimertinib treatment promotes EGFR internalization and nuclear translocation. (1) Endocytosis of EGFR with sortilin can result in translocation of the complex into the nucleus, where it binds to chromatin at the TSS, thereby repressing RNA Pol II binding and cMyc co-oncogene transcription. (2) Excess EGFR homodimers imported into the nucleus bind to a specific chromatin area and trigger the recruitment of RNA Pol II, activating transcription.





## 430 DISCUSSION

431 The present study showed that sortilin is a key regulator of nuclear EGFR and that it limits  
432 EGFR transducing activity. These findings suggest a mechanism for the biological activity of  
433 sortilin. In this model, sortilin interacts with EGFR at the chromatin regulatory elements of  
434 EGF response genes, such as those involved in cell reprogramming (*cMYC*) and proliferation  
435 (*CCND1*), both of which are hallmarks of cancer, with sortilin limiting their expression<sup>34</sup>.  
436 Figure 8 summarizes the role of sortilin in nuclear EGFR networking and its putative  
437 underlying mechanism. We had previously shown that sortilin plays an important striking role  
438 in directing EGFR toward rapid internalization and degradation following EGF stimulation<sup>15</sup>.  
439 PLA and nuclear IP immunoprecipitation experiments in the present study showed the  
440 spatiotemporal distribution of EGFR–sortilin complexes in the nuclei of EGF-stimulated cells.  
441 Chromatin immunoprecipitation and genome-wide analysis revealed that EGFR and sortilin  
442 were coordinately organized in complexes directed toward the regulatory elements of EGF  
443 response genes<sup>35,36</sup>. Indeed, the loci co-occupied by EGFR–sortilin were similar to those  
444 revealed by transcriptomic gene expression and genome-wide analysis<sup>35,36</sup>. The preferential  
445 accumulation of these complexes at TSS containing the EGFR binding chromatin sequence  
446 ATRS<sup>18,37</sup> suggest that they bind to chromatin through EGFR.

447 Because the expression of sortilin in NSCLC cell lines is low<sup>15</sup>, the role of sortilin in the  
448 EGFR transcriptional program was delineated using both constitutive and inducible models of  
449 *SORT1* expression in the highly aggressive cell line H1975, which expresses EGFR carrying  
450 the mutation T790M. Although sortilin affected EGFR stability, their interaction in the nucleus  
451 increased, as did sortilin chromatin binding. In this model, both EGFR and Pol II binding to  
452 the TSS surface of *cMYC* and *CCND1* decreased significantly, as did the levels of their  
453 respective mRNAs. Likewise, *SORT1* expression *in vivo* triggered a global slowdown of  
454 tumor progression, along with significant reductions in the levels of *cMYC* and *CCND1*  
455 mRNAs. These results suggest that sortilin was able to bind TSS sequences irrespective of  
456 stimuli, and that sortilin expression remains also crucial to limit EGFR nuclear networking.

457 These observations raised questions concerning whether neo-endocytosed EGFR could  
458 result in imbalances in nuclear EGFR–sortilin complexes. We therefore treated cells with the  
459 TKI osimertinib, which inhibits the kinase activity of EGFR, thereby limiting its  
460 phosphorylation and endocytosis, the first step in its nuclear importation. Although EGFR  
461 phosphorylation decreased, both EGFR and sortilin were imported into cell nuclei, increasing  
462 their binding to chromatin in A549 cells bearing wild-type EGFR, and markedly increasing  
463 *cMYC* mRNA in H1975 cells. Because, *cMYC* expression in osimertinib-treated H1975 cells  
464 decreased significantly only when sortilin was overexpressed, the amount of sortilin may be  
465 insufficient to alleviate the EGFR transcriptional program, particularly regarding *cMYC* gene  
466 activity. Sortilin expression was found to decrease with the pathologic grade of tumors<sup>15</sup>,

467 consistent with findings in this study showing that sortilin is downregulated in most malignant  
468 tissues. An assay of tissue samples from 54 patients with LUAD showed that only *cMYC*  
469 mRNA level was significantly decreased in malignant tissues with high levels of *SORT1*  
470 mRNA. A similar inverse correlation in *cMYC* and *SORT1* expression was observed in tumor  
471 tissues and solid cancer cell lines in publicly available datasets. Taken together, these  
472 results provide new insights into the tumor suppressor-like activity of sortilin, showing that it  
473 alters *cMYC* gene activity. Interestingly, *cMYC* belongs to the panel of genes co-occurring  
474 with the EGFR T790M mutation<sup>13</sup>. Because *cMYC* expression reprograms cells, resulting in  
475 the formation and maintenance of tumor-initiating cells endowed with metastatic capacities<sup>11</sup>,  
476 these cells become resistant to both anti-EGFR therapy<sup>12</sup> and radiotherapy<sup>38</sup>.

477 In summary, our findings provide insight into the role of sortilin in LUAD. Sortilin binds to  
478 the chromatin elements of EGF response genes, thereby repressing *cMYC* transcription.  
479 This potential mechanism of regulation suggests that sortilin expression may be predictive of  
480 tumor responses to anti-EGFR treatment and patient outcomes.

481

## 482 **MATERIALS & METHODS**

### 483 **Chromatin immunoprecipitation (ChIP) assay:**

484 Chromatin immunoprecipitation assays were performed using SimpleChIP® Enzymatic  
485 Chromatin IP Kits (Magnetic Beads) (#9003, Cell Signaling, Ozyme, France ). Briefly, about  
486  $2 \cdot 10^7$  cells were crosslinked with 1% formaldehyde for 10 min at room temperature. The  
487 formaldehyde reaction was quenched by adding glycine solution (#7005, Cell Signaling),  
488 followed by incubation for 5 min at room temperature. Crosslinked cells were harvested by  
489 centrifugation at 2000 x g for 5 min, washed twice with 20 mL ice-cold phosphate buffered  
490 saline (PBS, Gibco, France), and again centrifuged. Each cell pellet was resuspended in 4  
491 mL of 1X Nuclei isolation buffer A (#7006, Cell Signaling) containing 1 M dithiothreitol (DTT)  
492 (#7016, Cell Signaling) and protease inhibitor cocktail (PIC) (#7012, Cell Signaling), followed  
493 by incubation for 10 min on ice and centrifugation at 2000 x g for 6 min at 4°C. Each pellet  
494 was resuspended in 4 mL of 1X Nuclei isolation buffer B (#7007, Cell Signaling)  
495 supplemented with 1 M DTT, centrifuged at 2000 x g for 5 min at 4°C, resuspended in 400 µL  
496 buffer B containing 2 µL Micrococcal Nuclease (#10011, Cell Signaling), and incubated for 20  
497 min at 37°C with frequent mixing. DNA digestion was stopped by adding 0,5 M EDTA  
498 (#7011, Cell Signaling) and incubating on ice for 2 min. Nuclei were harvested by  
499 centrifugation at 16,000 x g for 1 min at 4°C, resuspended in 1X ChIP buffer (#7008, Cell  
500 Signaling) containing PIC, and lysed by sonification, and the lysates were centrifuged at 9  
501 400 x g for 10 min at 4°C. Following purification from the supernatant, the sizes and  
502 concentrations of DNA fragments were evaluated by 2% agarose electrophoresis and  
503 NanoDrop™ quantification (NanoDrop™ ND2000C, Thermo Scientific™, France).  
504 Immunoprecipitation assays were performed by mixing 50 µg DNA, 500 µL of 1X ChIP buffer  
505 with PIC, and 2 µg antibody to EGFR H11 (anti-EGFR H11, #MA5-13070, ThermoFisher  
506 Scientific™, France), sortilin (#ANT-009, Alomone, Israël), normal Rabbit IgG (#2729, Cell  
507 Signaling), or mouse (G3A1) mAb IgG1 isotype control (#5415S, Cell Signaling). The  
508 mixtures were incubated overnight at 4°C with rotation, and 30 µL ChIP-Grade Protein G  
509 Magnetic Beads (#9006, Cell Signaling) were added, followed by incubation for 3 h at 4°C  
510 with rotation. The beads were washed three times with low salt wash buffer (1X ChIP buffer)  
511 and once with high salt buffer (1X ChIP buffer; 1M NaCl). DNA and proteins were eluted from  
512 beads by adding 150 µL of 1X elution buffer (#7009, Cell Signaling) and heating at 65°C for  
513 30 min. Supernatants were harvested and digested by adding 2 µL proteinase K (#10012,  
514 Cell Signaling) and incubating overnight at 65°C. DNA was purified by loading onto  
515 Purification Columns (#10010, Cell Signaling) and eluting in 40 µL DNA elution buffer  
516 (#10009, Cell Signaling). ChIP assays were performed by qPCR using the fold enrichment  
517 method, which was based on differences in DNA quantity between specific antibody  
518 conditions and isotypic conditions of immunoprecipitation.

519

520 **Subcellular fractionation:**

521 Nuclear and cytoplasmic fractions were extracted from cells using NE-PER™ Nuclear and  
522 Cytoplasmic Extraction Reagent kits (Thermo Scientific™). Briefly, about  $1.10^6$  cells were  
523 harvested with trypsin-EDTA and centrifuged at 500 x g for 5 min. The cell pellets were  
524 washed with ice-cold PBS (Gibco) and harvested by centrifugation at 500 x g for 5 min. The  
525 cells were resuspended in Cytoplasmic Extraction Reagent I (CER I), mixed, and incubated  
526 on ice for 10 min. Cytoplasmic Extraction Reagent II (CER II) was added to the cell  
527 suspensions, which were incubated for 1 min on ice and centrifuged at 16 000 x g for 5 min  
528 at 4°C. The cytoplasmic fractions were harvested, and the pellets were washed with PBS  
529 and re-centrifuged. These nuclear pellets were resuspended in Nuclear Extraction Reagent  
530 (NER) and incubated on ice for 40 min, with mixing every 10 min. These nuclear lysates  
531 were centrifuged at 16 000 x g for 10 min at 4°C, and the nuclear fractions were harvested  
532 immediately. Subcellular fractionation was evaluated by western blotting. During these  
533 extractions, the CER I: CER II: NER volume ratios were maintained at 200: 11: 100 µL.

534

535 **Nuclear immunoprecipitation:**

536 Following the extraction of nuclear fractions, nuclear immunoprecipitations were performed  
537 using NE-PER™ Nuclear and Cytoplasmic Extraction Reagent kits (Thermo Scientific™).  
538 Briefly, nuclear extracts were diluted with radioimmunoprecipitation assay (RIPA) buffer (50  
539 mM Tris-HCl pH 8.0, 150 mM NaCl, 1% Nonidet P-40 (NP-40), 5% sodium deoxycholate,  
540 0.1% sodium dodecyl sulphate (SDS), 1 mM sodium orthovanadate, 1 mM NaF, 1% protease  
541 inhibitors). Antibodies for immunoprecipitation were incubated with Dynabeads™ linked to  
542 Protein G (#10003D, Invitrogen™) for 10 min at room temperature. Nuclear lysates were  
543 added, followed by incubation for 2 h at room temperature with agitation. The beads were  
544 washed three times with PBS (Gibco), and bound proteins were eluted by incubation with 2X  
545 Laemmli loading buffer (4% SDS, 10% 2-mercaptoethanol, 20% glycerol, 0.004%  
546 bromophenol blue, 0.125 M Tris-HCl) at 95°C for 10 min. SDS-PAGE and western blotting  
547 analysis were subsequently performed.

548

549 **Immunoblotting:**

550 Cells were washed with ice-cold PBS (Gibco) and lysed with cell lysis buffer (4% SDS, 10%  
551 2-mercaptoethanol, 20% glycerol, 0.125 M Tris-HCl pH 6.8) containing 1% PIC (#7012, Cell  
552 Signaling). The cell lysates were sonicated on a Vibra-Cell Sonifier, set at 60% amplitude,  
553 three times for 5 sec each, with at least 1 min on ice between pulses. The lysates were  
554 centrifuged at 16 000 x g for 20 min at 4°C, and their protein concentrations were measured

555 by Bradford protein assays. Aliquots containing 40 µg protein were loaded onto SDS-PAGE  
556 gels, with western blot analysis performed using specific antibodies against sortilin  
557 (#Ab16640, Abcam, France), P-EGFR (Tyr 1068, #3777, 1:1000 dilution; Cell Signaling),  
558 EGFR (#4267, 1:1000 dilution, Cell Signaling; clone H11 #MA5-13070, 1:500 dilution, Fisher  
559 Scientific, France), pERK1/2 (Thr202/Thr204, #4370, 1:1000 dilution, Cell Signaling), ERK1/2  
560 (#9102, 1:1000 dilution, Cell Signaling), pAKT (Ser 473, #4060, 1:1000 dilution, Cell  
561 Signaling), AKT (#4691, 1:1000 dilution, Cell Signaling), lamin b1 (#HPA050524, 1:1000  
562 dilution, Atlas Antibodies), tubulin (#sc-53646, Santa Cruz Biotechnology, Tebu, France), and  
563 actin (#A2066, 1:10000 dilution, Sigma, France), with the latter used as a loading control.  
564 The blots were subsequently incubated with horseradish peroxidase (HRP)-conjugated  
565 secondary antibodies (Dako, 1:1000 dilution, Agilent, France) and enhanced  
566 chemiluminescence substrate.

567

#### 568 **Cell culture:**

569 The A549 and H1975 cell lines were obtained from the American Type Culture Collection  
570 (ATCC) and cultured in Dulbecco's modified Eagle's medium GlutaMAX (Gibco)  
571 supplemented with 10% fetal bovine serum (IDbio, France), 1% antibiotics (Gibco), and 1%  
572 non-essential amino acids (Gibco) at 37°C in a humidified atmosphere containing 5% CO<sub>2</sub>.  
573 Where indicated, cells were stimulated with 50 ng/mL EGF for 30 min, or treated with 1 µM of  
574 the TKI Osimertinib (AZD9291, Tagrisso, Cliniscience, France) for 24 h.

575

#### 576 **Mice and *in vivo* tumor growth:**

577 Female NOD-SCID mice obtained from Janvier Labs (France) were housed in a control non-  
578 pathogen atmosphere. All experiments were performed in accordance with the French  
579 Veterinary Department. About 1.10<sup>6</sup> H1975 cells overexpressing sortilin in the presence of  
580 doxycycline were grafted onto the left thigh of each mouse. Tumor volume, calculated as  
581 length×width×(length+width)/2, was measured twice weekly. Following tumor development,  
582 mice were or were not administered 2 mg/mL doxycycline in drinking water. The mice were  
583 sacrificed 34 days after cell engraftment, and their tumors were collected. One part of each  
584 tumor was fixed in formaldehyde and embedded in paraffin for immunohistochemistry,  
585 whereas a second part was used to assess mRNA and protein overexpression by qPCR and  
586 western blotting, respectively.

587

#### 588 **Immunofluorescence and confocal microscopy:**

589 Cells grown on glass coverslips were washed twice in ice-cold PBS before fixation in  
590 methanol or 4% paraformaldehyde for 10 min on ice. The cells were washed with PBS  
591 containing 1% (w/v) BSA (IDbio) and incubated for 30 min with PBS containing 3% BSA. The

592 cells were immunolabeled at 4°C overnight with primary antibody to EGFR (Cell Signaling,  
593 Ozyme, #4267) or sortilin (Abcam, #ab16640, France), each diluted 1:100 in blocking  
594 solution. The cells were subsequently washed three times with PBS containing 1% BSA,  
595 incubated with Alexa Fluor 594-conjugated anti-rabbit IgG or Alexa Fluor 488-conjugated  
596 anti-mouse IgG antibodies (1:1000; Life Technologies, France) for 2 h at room temperature,  
597 and again washed three times with PBS containing 1% BSA. The cells were mounted using  
598 Fluoroshield mounting medium (Sigma), containing 4',6-diamidino-2-phenylindole (DAPI) to  
599 stain the nuclei. Endocytic assays were performed using biotinylated EGF complexed to  
600 Alexa Fluor 647, according to the manufacturer's instructions (Life Technologies, #E35351).  
601 Fluorescent images were obtained using epifluorescence microscopes (Zeiss Axiovert),  
602 equipped with a laser-scanning confocal imaging system (Zeiss LSM 510 META or LSM800).  
603 Mander's coefficients were calculated using the Zeiss LSM 510 META or ZEN software  
604 (Zeiss) on non-saturated pictures with optical slices of 0.8 µm. At least 30 cells were  
605 acquired for each condition. Cell surface expression of EGFR and sortilin, each calculated  
606 from the difference between the whole-cell and intracellular means of fluorescence, were  
607 analyzed using ImageJ software (NIH). For PLA, the cells were fixed with 4%  
608 paraformaldehyde for 10 min, permeabilized in PBS containing 0.1% Triton X-100 (Sigma)  
609 for 30 min on ice, and washed with PBS. The cells were subsequently incubated in blocking  
610 solution (2% BSA in PBS) for 30 min at 37°C in a humidified chamber, followed by incubation  
611 with primary antibodies against EGFR (mouse monoclonal, Life Technologies) and sortilin  
612 (rabbit polyclonal, Abcam), each diluted 1:100 in blocking solution, for 30 min at 37°C. The  
613 cells were washed with buffer A from the Duolink II proximity ligation assay kit (Olink  
614 Bioscience, Sigma), followed by the addition of Duolink II PLA probe anti-mouse Minus and  
615 Duolink II PLA probe anti-rabbit Plus, and incubation for 60 min at 37°C. To link the two  
616 probes, the cells were washed in buffer A and incubated for 30 min at 37°C in Duolink II  
617 ligation buffer diluted in filtered distilled water containing ligase. Following ligation, the cells  
618 were washed in buffer A and incubated for 100 min at 37°C with the Duolink II orange  
619 amplification buffer containing polymerase. The cells were then washed three times in buffer  
620 B and mounted with in-situ mounting medium containing DAPI. Quantitative analyses of each  
621 independent sample were performed using ImageJ software (NIH, Bethesda, Maryland,  
622 USA), based on the mean fluorescence values. At least 50 cells were acquired for each  
623 condition, with the results presented as ratios relative to control cells.

624

#### 625 **Plasmids and lentivirus-mediated RNA interference:**

626 The JetPei transfection reagent (Polyplus Transfection, Ozyme, France) was utilized for both  
627 transient and stable transfection of cells. Inducible sortilin overexpressing cell lines were  
628 generated by lentivirus-mediated RNA interference. Briefly, H1975 cells were infected twice,



629 once with lentivirus containing DNA encoding a Tet-On system and then with lentivirus  
630 encoding sortilin overexpression. About  $5 \times 10^5$  cells were infected in complete medium  
631 containing 8  $\mu\text{g/mL}$  polybrene (Sigma) and concentrated lentivirus (five lentiviral  
632 particles/cell) for 48 h, followed by selection with blasticidine (1  $\mu\text{g/mL}$ , Sigma). The cells  
633 were subsequently re-infected with the second type of lentivirus before selection with  
634 puromycin (1  $\mu\text{g/mL}$ , Sigma).

635

636 **Total RNA extraction and quantitative (q-)PCR analysis:**

637 Total RNA was extracted from 50 mg tissue or about  $1.10^6$  cells using QIAzol Lysis Reagent  
638 (#79306, QIAGEN, France). Briefly, tissues or cells were lysed in QIAzol reagent before the  
639 addition of chloroform and centrifugation. The aqueous phase of each sample was decanted,  
640 followed by precipitation with isopropanol at  $-80^\circ\text{C}$  for 1 h and centrifugation at 16 000 x g for  
641 10 min at  $4^\circ\text{C}$ . The RNA pellets were washed with 75% ethanol, again centrifuged at 16 000  
642 x g for 10 min at  $4^\circ\text{C}$ , and resuspended in water. Aliquots containing 2  $\mu\text{g}$  total RNA were  
643 reverse transcribed to cDNA using Superscript III (Invitrogen), according to the  
644 manufacturer's protocol. Each qPCR reaction contained 50 ng cDNA, TaqMan probes  
645 specific to each mRNA (Table), and Premix Ex Taq (#RR39WR, TaKaRa, France), with  
646 amplifications performed on a QuantStudio 3 real-time thermal cycler (Applied Biosystems,  
647 France). The results of RT-qPCR for each gene were normalized to those of ACTB mRNA  
648 expression in the same samples using the  $\Delta\Delta\text{Ct}$  method. ChIP-qPCR probes were designed  
649 to be complementary to the genomic DNA promoter sequence of each targeted gene and  
650 were synthesized by the custom TaqMan service from ThermoFisher Scientific.

651

652 Table: Probes synthesized for RT-qPCR

| Targeted gene | TaqMan™ probes references |
|---------------|---------------------------|
| ACTB          | Hs01060665_g1             |
| CCND1         | Hs00765553_m1             |
| DHODH         | Hs00361406_m1             |
| DUSP12        | Hs00170898_m1             |
| EGFR          | Hs01076090_m1             |
| MYC           | Hs00153408_m1             |
| SNAPC1        | Hs00608182_m1             |
| SORT1         | Hs00361760_m1             |
| STX6          | Hs01057343_m1             |

653



654 **Statistical analysis**

655 Relative fluorescence intensities and the results of western blotting and ChIP experiments  
656 were compared with controls using PAST software (version 2.17). Data shown are  
657 representative of at least three independent experiments. Error bars represent the standard  
658 error of the mean. Results were analyzed for statistical significance by ANOVA, with  $p \leq 0.05$   
659 considered statistically significant. Correlations between levels of *cMYC* and *SORT1* mRNAs  
660 in the TCGA and CCLE databases were evaluated by linear regression analysis using R  
661 software (version 3.6.1).

662

663 **Acknowledgements**

664 This study was generously supported by Chaire de Pneumologie Expérimentale from  
665 Association Limousine d'Aide aux Insuffisants Respiratoires-Assistance Ventilatoire à  
666 Domicile (ALAIR-AVD; Limoges, France), the Foundation of the University of Limoges, the  
667 Comité d'Orientation de la Recherche sur le Cancer en Limousin, and the Ligue Contre le  
668 Cancer. E.L. was supported by a doctoral fellowship from the Association du Développement  
669 Education Recherche-Limousin Poitou-Charentes (ADER-LPC). The authors thank all their  
670 colleagues who contributed their time and materials to this study, and thank Nicolas  
671 Vedrenne for his assistance with experiments on mice and human tissue samples. The  
672 authors are especially grateful to Alain Chaunavel from the "Centre de Ressources  
673 Biologiques Biolim," Department of Pathology, University Hospital Limoges, and Claire  
674 Carrion from the Imaging Cytometry Platform of the University of Limoges, for technical  
675 support.

676

677 **Competing interests**

678 The authors declare no competing interests.

679

680 **Author contributions**

681 L.E. and G.C. performed the experiments and analyzed the data. T.J. and C.A participated in  
682 the collection of patient samples and clinical data. G.F., J. M-O., B.F., M.B., V.F., N.T. and  
683 L.F. participated in the study design. G.F., J.M-O., F.V., N.T. and L.F. coordinated the study.  
684 All authors have read and approved the final manuscript.

685

686 **Data availability**

687 All relevant data are available from the corresponding authors on request.

688

689 **References**

- 690 1. Herbst, R. S., Heymach, J. V. & Lippman, S. M. Lung cancer. *N. Engl. J. Med.* **359**,  
691 1367–1380 (2008).
- 692 2. Sharma, S. V., Bell, D. W., Settleman, J. & Haber, D. A. Epidermal growth factor receptor  
693 mutations in lung cancer. *Nat. Rev. Cancer* **7**, 169 (2007).
- 694 3. Di Fiore, P. P. *et al.* Overexpression of the human EGF receptor confers an EGF-  
695 dependent transformed phenotype to NIH 3T3 cells. *Cell* **51**, 1063–1070 (1987).
- 696 4. McDermott, U. *et al.* Identification of genotype-correlated sensitivity to selective kinase  
697 inhibitors by using high-throughput tumor cell line profiling. *Proc. Natl. Acad. Sci. U. S. A.*  
698 **104**, 19936–19941 (2007).
- 699 5. Rosell, R. *et al.* Erlotinib versus standard chemotherapy as first-line treatment for  
700 European patients with advanced EGFR mutation-positive non-small-cell lung cancer  
701 (EURTAC): a multicentre, open-label, randomised phase 3 trial. *Lancet Oncol.* **13**, 239–  
702 246 (2012).
- 703 6. Pi, C. *et al.* EGFR mutations in early-stage and advanced-stage lung adenocarcinoma:  
704 Analysis based on large-scale data from China. *Thorac. Cancer* **9**, 814–819 (2018).
- 705 7. Chong, C. R. & Jänne, P. A. The quest to overcome resistance to EGFR-targeted  
706 therapies in cancer. *Nat. Med.* **19**, 1389–1400 (2013).
- 707 8. Liccardi, G., Hartley, J. A. & Hochhauser, D. EGFR nuclear translocation modulates DNA  
708 repair following cisplatin and ionizing radiation treatment. *Cancer Res.* **71**, 1103–1114  
709 (2011).
- 710 9. Li, C., Iida, M., Dunn, E. F., Ghia, A. J. & Wheeler, D. L. Nuclear EGFR contributes to  
711 acquired resistance to cetuximab. *Oncogene* **28**, 3801–3813 (2009).
- 712 10. Hsu, S.-C. & Hung, M.-C. Characterization of a novel tripartite nuclear localization  
713 sequence in the EGFR family. *J. Biol. Chem.* **282**, 10432–10440 (2007).
- 714 11. Poli, V. *et al.* MYC-driven epigenetic reprogramming favors the onset of tumorigenesis by  
715 inducing a stem cell-like state. *Nat. Commun.* **9**, 1024 (2018).

- 716 12. Strippoli, A. *et al.* c-MYC Expression Is a Possible Keystone in the Colorectal Cancer  
717 Resistance to EGFR Inhibitors. *Cancers* **12**, (2020).
- 718 13. Blakely, C. M. *et al.* Evolution and clinical impact of co-occurring genetic alterations in  
719 advanced-stage EGFR-mutant lung cancers. *Nat. Genet.* **49**, 1693–1704 (2017).
- 720 14. Santoni-Rugiu, E. *et al.* Intrinsic resistance to EGFR-Tyrosine Kinase Inhibitors in EGFR-  
721 Mutant Non-Small Cell Lung Cancer: Differences and Similarities with Acquired  
722 Resistance. *Cancers* **11**, (2019).
- 723 15. Al-Akhrass, H. *et al.* Sortilin limits EGFR signaling by promoting its internalization in lung  
724 cancer. *Nat. Commun.* **8**, 1182 (2017).
- 725 16. Wilson, C. M. *et al.* Sortilin mediates the release and transfer of exosomes in concert  
726 with two tyrosine kinase receptors. *J. Cell Sci.* **127**, 3983–3997 (2014).
- 727 17. Faraco, C. C. F. *et al.* Translocation of Epidermal Growth Factor (EGF) to the nucleus  
728 has distinct kinetics between adipose tissue-derived mesenchymal stem cells and a  
729 mesenchymal cancer cell lineage. *J. Struct. Biol.* **202**, 61–69 (2018).
- 730 18. Lin, S. Y. *et al.* Nuclear localization of EGF receptor and its potential new role as a  
731 transcription factor. *Nat. Cell Biol.* **3**, 802–808 (2001).
- 732 19. Brand, T. M., Iida, M., Li, C. & Wheeler, D. L. The Nuclear Epidermal Growth Factor  
733 Receptor Signaling Network and its Role in Cancer. *Discov. Med.* **12**, 419–432 (2011).
- 734 20. Tomas, A., Futter, C. E. & Eden, E. R. EGF receptor trafficking: consequences for  
735 signaling and cancer. *Trends Cell Biol.* **24**, 26–34 (2014).
- 736 21. Chung, B. M. *et al.* Aberrant trafficking of NSCLC-associated EGFR mutants through the  
737 endocytic recycling pathway promotes interaction with Src. *BMC Cell Biol.* **10**, 84 (2009).
- 738 22. Huang, W.-C. *et al.* Nuclear translocation of epidermal growth factor receptor by Akt-  
739 dependent phosphorylation enhances breast cancer-resistant protein expression in  
740 gefitinib-resistant cells. *J. Biol. Chem.* **286**, 20558–20568 (2011).
- 741 23. Ramalingam, S. S. *et al.* Overall Survival with Osimertinib in Untreated, EGFR-Mutated  
742 Advanced NSCLC. *N. Engl. J. Med.* **382**, 41–50 (2020).

- 743 24. Kawamata, H., Kameyama, S. & Oyasu, R. In vitro and in vivo acceleration of the  
744 neoplastic phenotype of a low-tumorigenicity rat bladder carcinoma cell line by  
745 transfected transforming growth factor- $\alpha$ . *Mol. Carcinog.* **9**, 210–219 (1994).
- 746 25. Ohsaki, Y. *et al.* Epidermal growth factor receptor expression correlates with poor  
747 prognosis in non-small cell lung cancer patients with p53 overexpression. *Oncol. Rep.* **7**,  
748 603–607 (2000).
- 749 26. Bethune, G., Bethune, D., Ridgway, N. & Xu, Z. Epidermal growth factor receptor  
750 (EGFR) in lung cancer: an overview and update. *J. Thorac. Dis.* **2**, 48–51 (2010).
- 751 27. Nicholson, R. I., Gee, J. M. & Harper, M. E. EGFR and cancer prognosis. *Eur. J. Cancer*  
752 *Oxf. Engl. 1990* **37 Suppl 4**, S9-15 (2001).
- 753 28. Hou, J. *et al.* Gene expression-based classification of non-small cell lung carcinomas and  
754 survival prediction. *PLoS One* **5**, e10312 (2010).
- 755 29. Selamat, S. A. *et al.* Genome-scale analysis of DNA methylation in lung adenocarcinoma  
756 and integration with mRNA expression. *Genome Res.* **22**, 1197–1211 (2012).
- 757 30. Gao, J. *et al.* Integrative analysis of complex cancer genomics and clinical profiles using  
758 the cBioPortal. *Sci. Signal.* **6**, p11 (2013).
- 759 31. Cerami, E. *et al.* The cBio cancer genomics portal: an open platform for exploring  
760 multidimensional cancer genomics data. *Cancer Discov.* **2**, 401–404 (2012).
- 761 32. Cancer Genome Atlas Research Network. Comprehensive molecular profiling of lung  
762 adenocarcinoma. *Nature* **511**, 543–550 (2014).
- 763 33. Barretina, J. *et al.* The Cancer Cell Line Encyclopedia enables predictive modelling of  
764 anticancer drug sensitivity. *Nature* **483**, 603–607 (2012).
- 765 34. Hanahan, D. & Weinberg, R. A. The hallmarks of cancer. *Cell* **100**, 57–70 (2000).
- 766 35. Amit, I. *et al.* A module of negative feedback regulators defines growth factor signaling.  
767 *Nat. Genet.* **39**, 503–512 (2007).
- 768 36. Mikula, M. *et al.* Genome-wide co-localization of active EGFR and downstream ERK  
769 pathway kinases mirrors mitogen-inducible RNA polymerase 2 genomic occupancy.  
770 *Nucleic Acids Res.* **44**, 10150–10164 (2016).

- 771 37. Brand, T. M., Iida, M., Li, C. & Wheeler, D. L. The nuclear epidermal growth factor  
772 receptor signaling network and its role in cancer. *Discov. Med.* **12**, 419–432 (2011).
- 773 38. Yu, Y.-L. *et al.* Nuclear EGFR suppresses ribonuclease activity of polynucleotide  
774 phosphorylase through DNAPK-mediated phosphorylation at serine 776. *J. Biol. Chem.*  
775 **287**, 31015–31026 (2012).
- 776
